# Supplementary material for: Machine learning and word sense disambiguation in the biomedical domain: design and evaluation issues
Source: Springer Nature journal article supplement (doi:10.1186/1471-2105-7-334), 2006-07-05

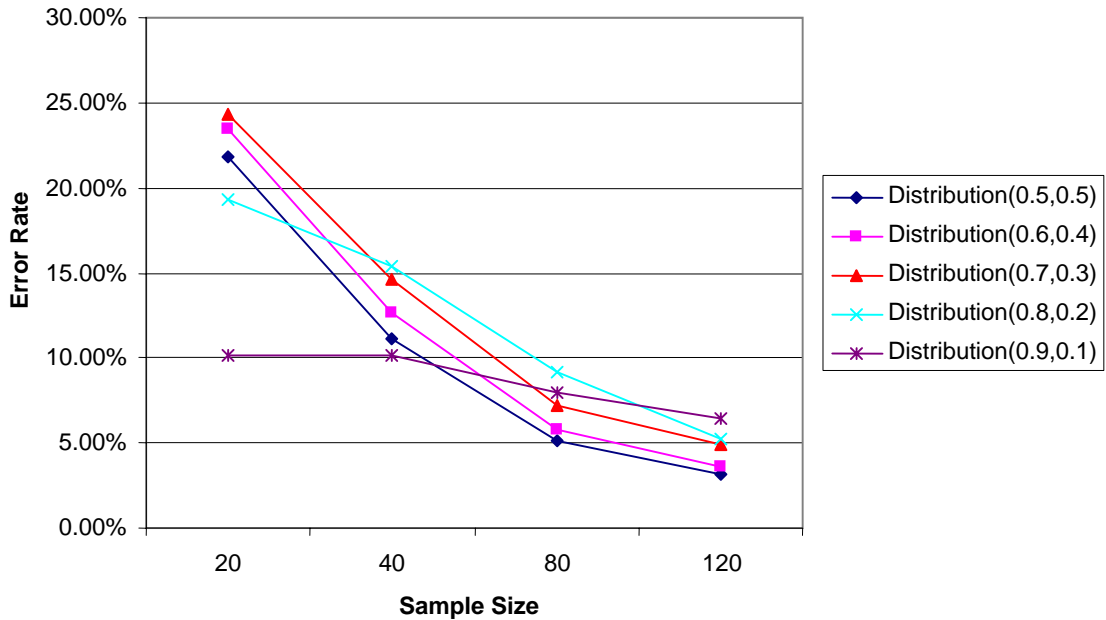

Supplement: 12859_2006_1073_MOESM2_ESM.pdf [file 12859_2006_1073_MOESM2_ESM.pdf]
